# Supplementary material for: Obstacle-induced giant jammed aggregation of active semiflexible filaments
Source: Royal Society of Chemistry journal article supplement (doi:10.1039/d2cp02819k), 2022-01-01
Supplement: d2cp02819k1.pdf [file d2cp02819k1.pdf]

## Obstacle-induced giant jammed aggregation of active semiflexible filaments Supplementary Information

Ying Wang,<sup>a</sup> Yi-wen Gao,<sup>a</sup> Wen-de Tian,<sup>\*a</sup> and Kang Chen<sup>\*ab</sup>

<sup>a</sup>Center for Soft Condensed Matter Physics & Interdisciplinary Research, School of Physical Science and  
Technology, Soochow University, Suzhou 215006, China

<sup>b</sup>School of Physics and Information Engineering, Shanxi Normal University, Linfen 041004, China

\*Corresponding authors: [kangchen@suda.edu.cn](mailto:kangchen@suda.edu.cn) (K.C.); [tianwende@suda.edu.cn](mailto:tianwende@suda.edu.cn) (W.-d.T.)

### I. Supplemental figures

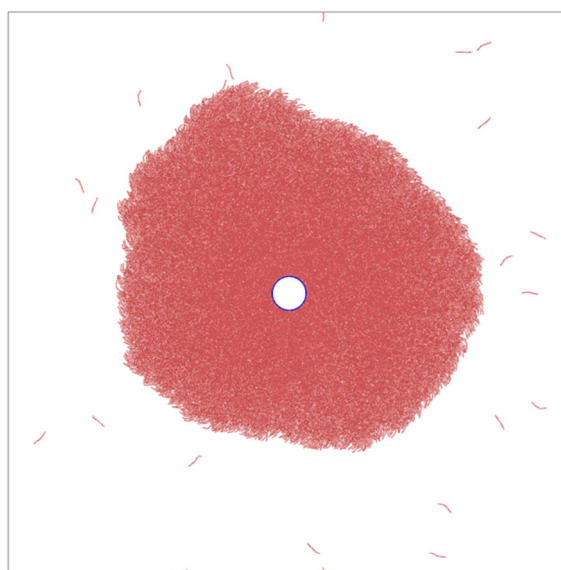

Fig. S1 Eventual assembling structure for large simulation box  $500\sigma \times 500\sigma$  ( $K_a = 20$ ,  $F_a = 5$ ). The concentration is  $\phi = 0.3$  ( $n = 6364$  AP chains and totally 95460 chain beads).

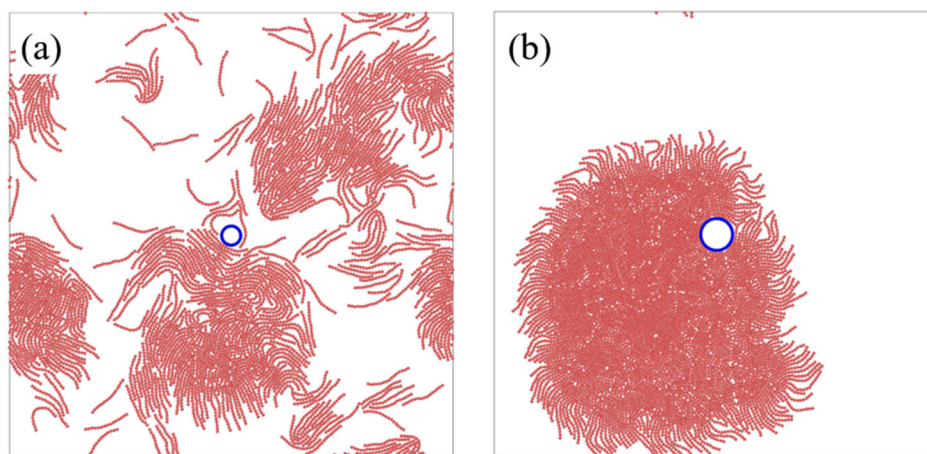

Fig. S2 Eventual assembling structure for various obstacle sizes ( $K_a = 20$ ,  $F_a = 5$ ). (a)  $R = 3\sigma$ ; (b)  $R = 5\sigma$ .

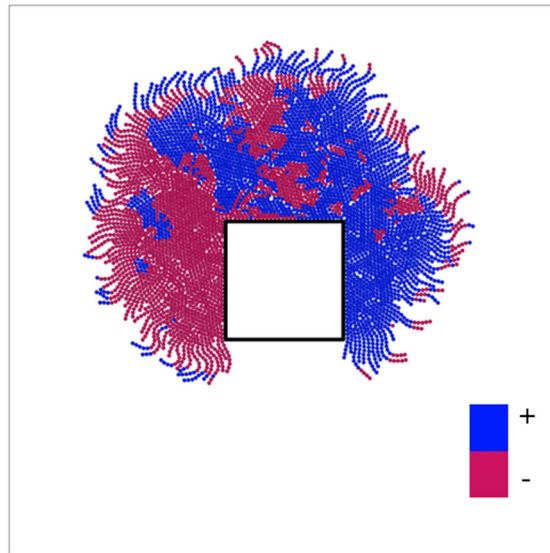

Fig. S3 Eventual assembling structure for a square obstacle of side length  $30\sigma$  ( $K_a = 20$ ,  $F_a = 5$ ). The colors show the local chirality as in Fig. 1.

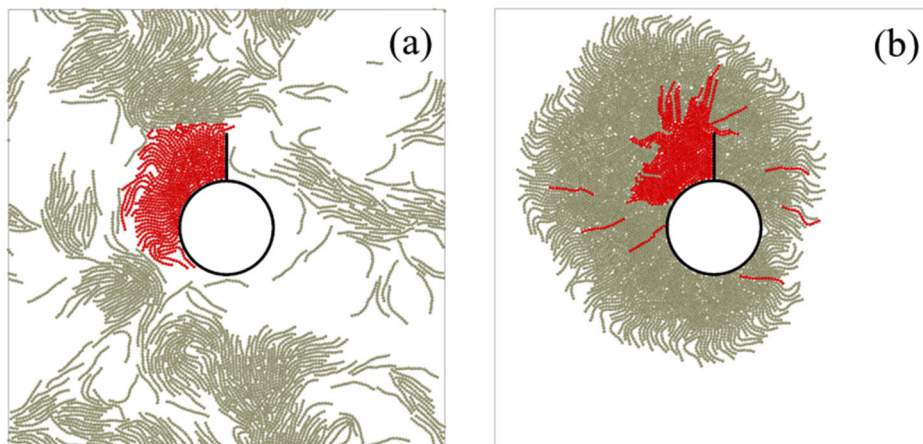

Fig. S4 Snapshots for a circular obstacle with a stick-like protrusion of length  $L_p = 15\sigma$  ( $K_a = 20$ ,  $F_a = 5$ ). (a) The formation of the initial nucleus; (b) the eventual GJA.

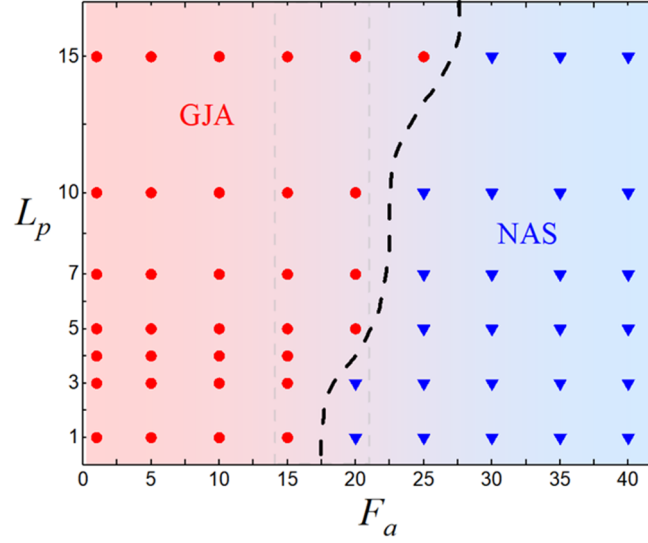

Fig. S5 Shift of the GJA-NAS transition boundary upon the length of the protrusion ( $K_a = 20$ ).

## II. Supplemental movies

Movie S1: Spirals ( $K_a = 1$  and  $F_a = 40$ ).

Movie S2: Transient vortex ( $K_a = 8$  and  $F_a = 1$ ).

Movie S3: Stationary GJA ( $K_a = 30$  and  $F_a = 15$ ). The colors show the local chirality as in Fig. 1.

Movie S4: Chiral GJA in rotation ( $K_a = 10$  and  $F_a = 1$ ). The colors show the local chirality as in Fig. 1.

Movie S5: Nucleation: A single drifting AP cluster collides head-on with the obstacle and dominates in the formation of a hedgehog-like nucleus ( $K_a = 20$ ,  $F_a = 5$  and  $\phi = 0.2$ ).

Movie S6: Nucleation: Several small AP clusters collide onto the obstacle and merge into a nucleus ( $K_a = 20$ ,  $F_a = 5$  and  $\phi = 0.2$ ).

Movie S7: Nucleation: Big AP clusters collide and slide on the surface of the obstacle and generate the nucleus accidentally ( $K_a = 15$ ,  $F_a = 5$  and  $\phi = 0.3$ ).

Movie S8: AP aggregate slides off the square surface ( $K_a = 20$ ,  $F_a = 5$  and  $\phi = 0.2$ ).

Movie S9: Formation of jammed aggregation of APs without the obstacle ( $K_a = 35$ ,  $F_a = 17$  and  $\phi = 0.3$ ).
